# Supplementary material
Source: HighWire-hosted journal article supplement (https://cmaj.ca/highwire/filestream/77705/field_highwire_adjunct_files/1/201055-res-2-at.pdf)
Supplement: 201055-res-2-at.pdf [file 201055-res-2-at.pdf]

## Appendix 2 (as supplied by the authors): 72-Hour Telephone Survey Script

Hello,

My name is [ ] and I am a research assistant working in the research study comparing Buscopan to acetaminophen in which you agreed to have your child participate. As discussed when your child was enrolled, this is a follow-up phone call to see how your child is doing. This should take no more than five minutes of your time.

I am going to ask you about your child's symptoms and health care visits. Should you have any questions, I will do my best to answer them. However, I will be unable to respond to questions that are not considered part of the study protocol. If I am unable to answer your question, the principle investigator of the study, Dr. Naveen Poonai will contact you. Do you have any questions before we begin?

1. Is your child still having abdominal pain? YES NO

2. Since receiving the medication we gave you in the ER, have you noticed any side effects?

YES NO

If YES, please list your symptoms: \_\_\_\_\_

3. Since your discharge from the ER, have you taken your child to see another health care provider or facility? YES NO

If YES

3. a) What was the reason for your visit: \_\_\_\_\_

3. b) What type of health care provider/facility did you visit? \_\_\_\_\_

3. c) Was hospitalization required? YES NO

3. d) Was medication prescribed or given? YES NO If YES, what type? \_\_\_\_\_
